# Supplementary material for: Antimicrobial resistance genetic factor identification from whole-genome sequence data using deep feature selection
Source: PubMed Central journal article supplement (PMC6929425; doi:10.1186/s12859-019-3054-4), 2019-12-24
Supplement: 12859_2019_3054_MOESM1_ESM.pdf [file 12859_2019_3054_MOESM1_ESM.pdf]

# Supplementary Material

## Antimicrobial resistance genetic factor identification from whole-genome sequence data using deep feature selection

Jinhong Shi<sup>1</sup>, Yan Yan<sup>1</sup>, Matthew G. Links<sup>1,2</sup>, Longhai Li<sup>3</sup>, Jo-Anne R. Dillon<sup>4,5</sup>, Michael Horsch<sup>1</sup> and Anthony Kusalik<sup>1\*</sup>

\*Correspondence:

tony.kusalik@usask.ca

<sup>1</sup>Department of Computer Science, University of Saskatchewan, 110 Science Place, S7N 5C9 Saskatoon, Canada  
Full list of author information is available at the end of the article

### Section 1: Back-propagated Gradients in Neural Network Training for Feature Selection

It is an optimization problem to find the weights of a neural network by minimizing its cost function. A general form of cost functions can be written as a summation of loss function and regularized items [1]:

$$J(w) = C(w) + \lambda_2 \sum_{i=1}^p \alpha_{2,i} |w_i|^2 + \lambda_1 \sum_{i=1}^p \alpha_{1,i} |w_i| \quad (1)$$

where

$$C(w) = \frac{1}{m} \sum_{i=1}^m (y_i - \sum_{j=1}^p x_{ij} w_j)$$

is the loss function that measures the difference between true values and predictive values. The second item in Equation (1) is a generalized form of  $L_2$  regularization and the third one is  $L_1$  regularization. The parameters  $\lambda_1$  and  $\lambda_2$  control the strength of penalization on the magnitude of coefficients in the trained model. A larger  $\lambda$  leads to a less complex model, and thus  $L_1$  and  $L_2$  regularization is an effective way to prevent overfitting in large complex model training. Usually,  $\lambda_1, \lambda_2 \in [0, 1]$  and  $\alpha_{1,i}, \alpha_{2,i} \in [0, 1]$ .

Gradient descent is a technique used to find the solution to the optimization problem in Equation (1). Taking the derivative of it, and we get

$$\begin{aligned} \frac{\partial J(w)}{\partial w_i} &= \frac{\partial C(w)}{\partial w_i} + 2\lambda_2 \alpha_{2,i} w_i + \lambda_1 \alpha_{1,i} \text{sign}(w_i) \\ &= \frac{\partial C(w)}{\partial w_i} + 2\lambda_2 \alpha_{2,i} w_i \pm \lambda_1 \alpha_{1,i} \end{aligned}$$

For feature selection, the input features are divided into a candidate set  $\mathcal{C}$ , in which the weights of each feature are fixed to zero, and a selected set  $\mathcal{S}$ , in which the weights of each feature are optimized during the training of the subnetwork with

selected features in the input layer. Therefore, for each feature  $F_i$  in candidate set  $\mathcal{C}$ , its weight  $w_i$  is 0. Then we get

$$\frac{\partial J(w)}{\partial w_i} = \frac{\partial C(w)}{\partial w_i} \pm \lambda_1 \alpha_{1,i} \quad (2)$$

Notice that we replaced  $\text{sign}(w_i)$  by  $\pm 1$ . Derivative is not defined for the absolute value function  $|x|$  at  $x = 0$ . However, here we mainly focus on which feature is to be selected so that Equation (1) is decreased the most when we adjust its weights away from 0 (adding it to  $\mathcal{S}$  from  $\mathcal{C}$ ).

When  $\lambda_1 \alpha_{1,i} \geq 0$ , if

$$\frac{\partial C(w)}{\partial w_i} > \lambda_1 \alpha_{1,i},$$

then

$$\frac{\partial J(w)}{\partial w_i} = \frac{\partial C(w)}{\partial w_i} + \lambda_1 \alpha_{1,i} > 0,$$

and

$$\frac{\partial J(w)}{\partial w_i} = \frac{\partial C(w)}{\partial w_i} - \lambda_1 \alpha_{1,i} > 0.$$

Therefore, to decrease  $J(w)$ , we need to decrease  $w_i$ , so we will get  $w_i < 0$ . Similarly, if

$$\frac{\partial C(w)}{\partial w_i} < -\lambda_1 \alpha_{1,i},$$

then

$$\frac{\partial J(w)}{\partial w_i} = \frac{\partial C(w)}{\partial w_i} \pm \lambda_1 \alpha_{1,i} < 0.$$

In this case, to decrease  $J(w)$ , we need to increase  $w_i$ , so we will get  $w_i > 0$ . In summary, when

$$\left| \frac{\partial C(w)}{\partial w_i} \right| > \lambda_1 \alpha_{1,i},$$

we can decrease  $J(w)$  by adjusting  $w_i$  away from zero, while if

$$\left| \frac{\partial C(w)}{\partial w_i} \right| < \lambda_1 \alpha_{1,i},$$

we can only increase  $J(w)$  no matter how we adjust  $w_i$  away from zero. This is why when the regularization parameter  $\lambda_1$  is large,  $L_1$  regularization will result in a

sparse model with many zero-valued weights. When only  $L_2$  regularization is used, then Equation (2) becomes

$$\frac{\partial J(w)}{\partial w_i} = \frac{\partial C(w)}{\partial w_i} \tag{3}$$

In both Equation (2) and Equation (3), we can see that the larger the magnitude of  $|\partial J(w)/\partial w_i|$ , the more it will contribute to minimizing  $J(w)$  by updating  $w_i$  from zero. This is why the norm of the back-propagated gradient for each feature in the candidate set can be used as the criterion for feature selection. DNP and grafting both used gradients in their feature selection algorithms [1, 2].

**Figure 1: Illustration of how features are selected in DNP (deep neural pursuit).**

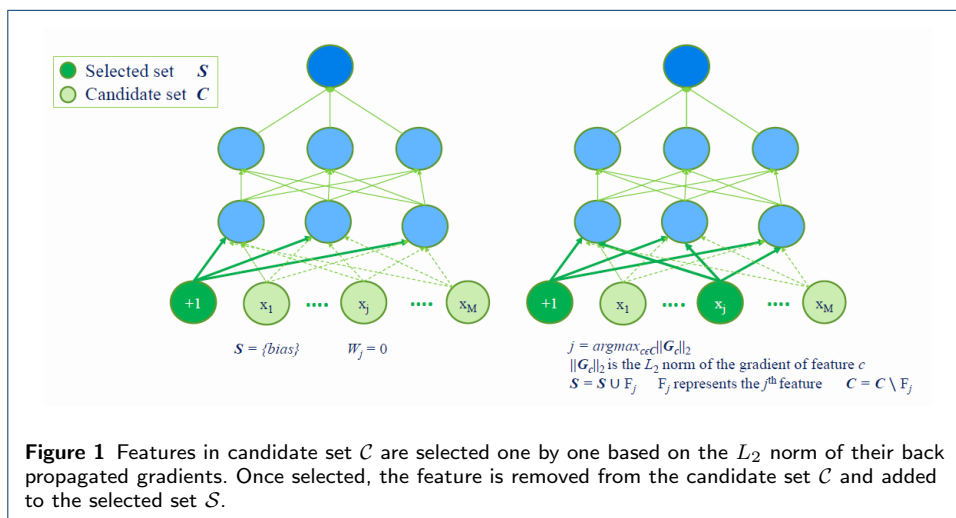

**Figure 2: Histogram of MIC Distribution of the Five Antibiotics**

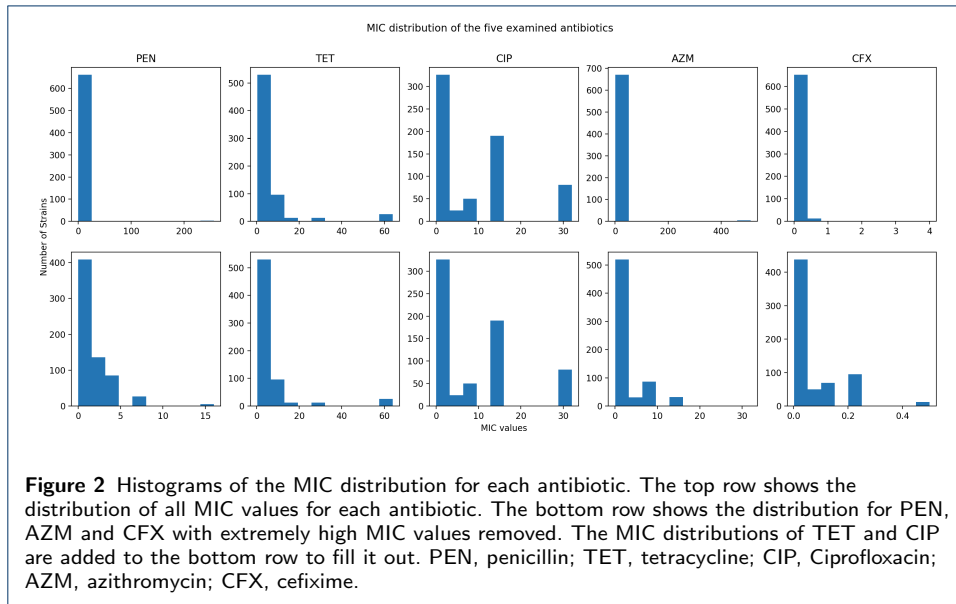

**Figure 3: ROC curves and AUCs for the predicted resistance profiles for the five antibiotics under consideration using SNPs identified by AdaBoost.**

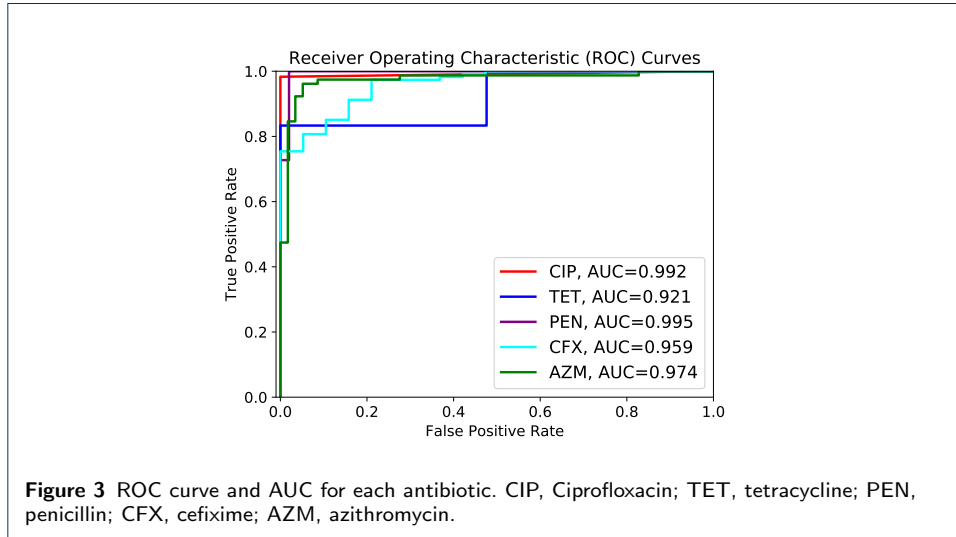

**Figure 4: ROC curves and AUCs for the predicted resistance profiles for the five antibiotics under consideration using SNPs identified by LASSO.**

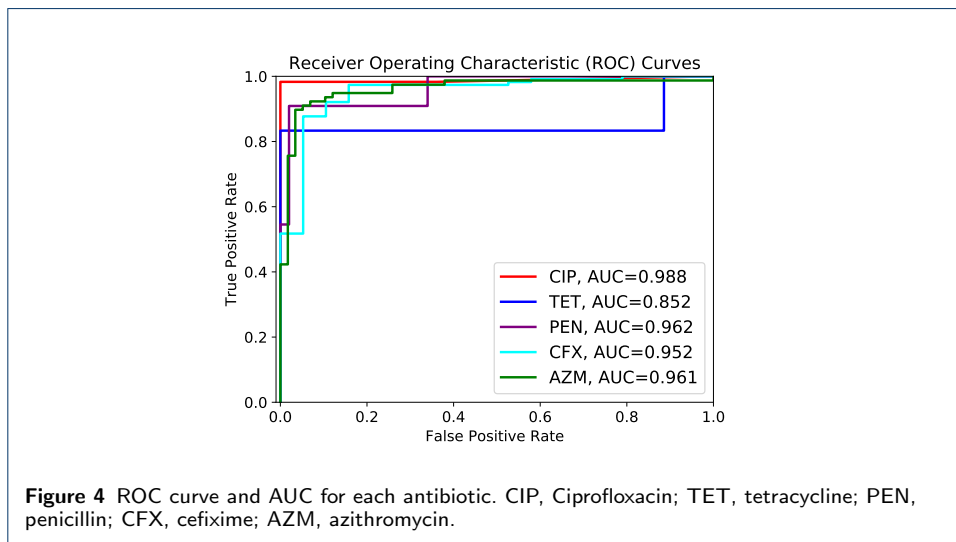

**Table 1** CLSI breakpoints for each antibiotic [3]

| Antibiotic | MIC Interpretative Standards (ug/ml) |            |       |        |
|------------|--------------------------------------|------------|-------|--------|
|            | S                                    | I          | R     | DS     |
| PEN        | ≤ 0.06                               | 0.12 ~ 1.0 | ≥ 2.0 |        |
| TET        | ≤ 0.25                               | 0.5 ~ 1.0  | ≥ 2.0 |        |
| CIP        | ≤ 0.06                               | 0.12 ~ 0.5 | ≥ 1.0 |        |
| AZM*       | ≤ 1.0                                |            | ≥ 2.0 |        |
| CFX*       | ≤ 0.125                              |            |       | ≥ 0.25 |

PEN, penicillin; TET, tetracycline; CIP, Ciprofloxacin; AZM, azithromycin; CFX, cefixime.  
 S = Susceptible, I = Intermediate, R = Resistant, DS = Decreased Susceptibility  
 \*The breakpoints for AZM and CFX are from Centers for Disease Control and Prevention, 2007 [4] and World Health Organization 2012 [5], respectively.

**Table 2** Chromosomal loci associated with antimicrobial resistance to the five antibiotics in *N. gonorrhoeae* examined in this work [6–8]. Plasmid genes are also listed, but only for reference purposes.

| AMR elements                 | Antibiotic | CIP | AZM | TET | CFX | PEN | Mechanisms                                       |
|------------------------------|------------|-----|-----|-----|-----|-----|--------------------------------------------------|
| gyrA                         |            | ✓   |     |     |     |     | Antibiotic target alteration                     |
| parC                         |            | ✓   |     |     |     |     |                                                  |
| rpsJ                         |            |     |     | ✓   |     |     |                                                  |
| penA                         |            |     |     |     | ✓   | ✓   |                                                  |
| ponA                         |            |     |     |     | ✓   | ✓   |                                                  |
| 23S rRNA                     |            |     | ✓   |     |     |     |                                                  |
| norM                         |            | ✓   |     |     |     |     | Antibiotic efflux                                |
| norM promoter                |            | ✓   |     |     |     |     |                                                  |
| mtrR                         |            |     | ✓   | ✓   | ✓   | ✓   |                                                  |
| mtrR promoter                |            |     | ✓   | ✓   | ✓   | ✓   |                                                  |
| macAB                        |            |     | ✓   |     |     |     |                                                  |
| penB (porB)                  |            |     |     | ✓   | ✓   | ✓   | Decrease in permeation across the outer membrane |
| penC (pilQ)                  |            |     |     |     | ✓   | ✓   |                                                  |
| erm(B, C, F) (plasmid)       |            |     | ✓   |     |     |     | Plasmid mediated resistances                     |
| ere(A, B) (plasmid)          |            |     | ✓   |     |     |     |                                                  |
| mef (plasmid)                |            |     | ✓   |     |     |     |                                                  |
| bla <sub>TEM</sub> (plasmid) |            |     |     |     |     | ✓   |                                                  |
| tetM (plasmid)               |            |     |     | ✓   |     |     |                                                  |

**Table 3** SNPs identified for resistance to CIP, CFX, PEN, TET, and AZM by DNP-AAP. Annotations are from NCBI.

| Ciprofloxacin (CIP) |       |       |             |                                                                    |          |
|---------------------|-------|-------|-------------|--------------------------------------------------------------------|----------|
| ID Range            | ID    | AAP   | Genes       | Annotations                                                        | Reported |
| [18797, 18817]      | 18799 | 0.658 | <i>gyrA</i> | DNA gyrase subunit A                                               | ✓        |
| [4309, 4366]        | 4363  | 0.536 | <i>parC</i> | DNA topoisomerase IV subunit A                                     | ✓        |
|                     | 5087  | 0.506 |             | *intergenic between NGK_RS01270 and NGK_RS01275                    |          |
|                     | 5075  | 0.497 | NGK_RS01270 | glutathione synthetase                                             |          |
|                     | 34282 | 0.483 |             | *intergenic between NGK_RS09910 and NGK_RS09915                    |          |
|                     | 33843 | 0.482 |             | *intergenic between NGK_RS09815 and NGK_RS09830                    |          |
|                     | 20553 | 0.478 | NGK_RS00430 | sugar transporter                                                  |          |
|                     | 2285  | 0.477 | NGK_RS00430 | RNA-binding protein                                                |          |
|                     | 34301 | 0.475 | NGK_RS09920 | hypoxanthine-guanine phosphoribosyltransferase                     |          |
|                     | 16353 | 0.447 | NGK_RS04915 | conjugative coupling factor TraD, PFGI-1 class                     |          |
| Cefixime (CFX)      |       |       |             |                                                                    |          |
|                     | 31799 | 0.423 |             | *intergenic between NGK_RS09405 and NGK_RS09440                    |          |
| [28398, 28481]      | 28431 | 0.419 | <i>penA</i> | penicillin-binding protein 2                                       | ✓        |
| [28398, 28481]      | 28418 | 0.406 | <i>penA</i> | penicillin-binding protein 2                                       | ✓        |
|                     | 29914 | 0.402 |             | *intergenic between NGK_RS08825 and NGK_RS13555                    |          |
| [28398, 28481]      | 28417 | 0.382 | <i>penA</i> | penicillin-binding protein 2                                       | ✓        |
| [28398, 28481]      | 28428 | 0.382 | <i>penA</i> | penicillin-binding protein 2                                       | ✓        |
|                     | 29915 | 0.376 |             | *intergenic between NGK_RS08825 and NGK_RS13555                    |          |
|                     | 29916 | 0.370 |             | *intergenic between NGK_RS08825 and NGK_RS13555                    |          |
| [28398, 28481]      | 28427 | 0.368 | <i>penA</i> | penicillin-binding protein 2                                       | ✓        |
| [28398, 28481]      | 28429 | 0.367 | <i>penA</i> | penicillin-binding protein 2                                       | ✓        |
| Penicillin (PEN)    |       |       |             |                                                                    |          |
|                     | 38424 | 0.344 | NGK_RS11280 | CRISPR-associated protein Cas4                                     |          |
|                     | 33601 | 0.342 | NGK_RS09760 | Opacity protein opA54                                              |          |
|                     | 18799 | 0.330 | <i>gyrA</i> | DNA gyrase subunit A                                               |          |
|                     | 29502 | 0.322 | NGK_RS08530 | monofunctional biosynthetic peptidoglycan transglycosylase         |          |
|                     | 29504 | 0.251 | NGK_RS08530 | monofunctional biosynthetic peptidoglycan transglycosylase         |          |
| [2749, 2763]        | 2755  | 0.236 | <i>ponA</i> | penicillin-binding protein 1A                                      | ✓        |
|                     | 35095 | 0.219 | NGK_RS10250 | adhesin MafA                                                       |          |
|                     | 10120 | 0.213 | NGK_RS03045 | hypothetical protein                                               |          |
|                     | 40335 | 0.204 |             | *intergenic between NGK_RS11800 and NGK_RS11805                    |          |
|                     | 6817  | 0.203 | NGK_RS01835 | 23S rRNA pseudouridine(1911/1915/1917) synthase RluD               |          |
| Tetracycline (TET)  |       |       |             |                                                                    |          |
|                     | 27095 | 0.470 |             | *intergenic between NGK_RS07930 and NGK_RS07935                    |          |
| [37926, 37927]      | 21468 | 0.205 | NGK_RS06540 | DUF3037 domain-containing protein                                  | ✓        |
|                     | 37927 | 0.196 | <i>rpsJ</i> | 30S ribosomal protein S10                                          |          |
|                     | 29960 | 0.159 |             | *intergenic between NGK_RS13555 and NGK_RS08865                    |          |
|                     | 37300 | 0.150 | NGK_RS10900 | methionyl-tRNA formyltransferase                                   |          |
|                     | 40041 | 0.131 | NGK_RS11710 | TonB-dependent receptor                                            |          |
|                     | 21467 | 0.121 | NGK_RS06540 | DUF3037 domain-containing protein                                  |          |
|                     | 9785  | 0.120 | NGK_RS02995 | PBSX family phage terminase large subunit                          |          |
|                     | 9787  | 0.120 | NGK_RS02995 | PBSX family phage terminase large subunit                          |          |
|                     | 18761 | 0.119 | NGK_RS05725 | MULTISPECIES: Fe-S cluster assembly transcriptional regulator IscR |          |
| Azithromycin (AZM)  |       |       |             |                                                                    |          |
|                     | 27421 | 0.424 |             | *intergenic between NGK_RS13375 and NGK_RS07950                    |          |
|                     | 27690 | 0.420 |             | *intergenic between NGK_RS08005 and NGK_RS08015                    |          |
|                     | 30659 | 0.300 | NGK_RS09100 | IS110 family transposase                                           |          |
|                     | 36328 | 0.294 | NGK_RS10580 | pilus assembly protein                                             |          |
|                     | 36810 | 0.290 |             | *intergenic between NGK_RS10625 and NGK_RS10660                    |          |
|                     | 30434 | 0.278 | NGK_RS08975 | DUF1132 domain-containing protein                                  |          |
|                     | 21513 | 0.269 | NGK_RS06565 | MULTISPECIES: hypothetical protein                                 |          |
|                     | 39676 | 0.266 | NGK_RS11620 | homoserine kinase                                                  |          |
|                     | 36809 | 0.258 |             | *intergenic between NGK_RS10625 and NGK_RS10660                    |          |
|                     | 29095 | 0.254 | NGK_RS08360 | MULTISPECIES: phosphatidylglycerophosphatase A                     |          |

The column "ID Range" lists the ranges of SNPs that fall in known AMR-associated genes (only) in our data. ID: ID of Identified SNP.

\*NGK\_RS01270: glutathione synthetase; NGK\_RS01275: diacylglycerol kinase (DagK); NGK\_RS09910: MULTISPECIES: HPr family phosphocarrier protein; NGK\_RS09915: PTS sugar transporter subunit IIA; NGK\_RS09815: iron uptake system protein EfeO; NGK\_RS09830: murein transglycosylase; NGK\_RS09405: competence protein ComE; NGK\_RS09440: inner membrane protein YpjD; NGK\_RS08825: competence protein ComE; NGK\_RS13555: hypothetical protein, partial; NGK\_RS11800: hemoglobin-haptoglobin-utilization protein; NGK\_RS11805: DUF560 domain-containing protein; NGK\_RS07930: lactoferrin/transferrin family TonB-dependent receptor; NGK\_RS07935: transferrin-binding protein-like solute binding protein; NGK\_RS08865: MULTISPECIES: P-II family nitrogen regulator; NGK\_RS13375: hypothetical protein; NGK\_RS07950: Fic family protein; NGK\_RS08005: prephenate dehydratase; NGK\_RS08015: membrane protein; NGK\_RS10625: MULTISPECIES: RNA polymerase-binding protein DksA; NGK\_RS10660: competence protein ComE.

**Table 4** Numbers of SNPs identified by DNP-AAP, LASSO, and AdaBoost which occur in known AMR determinants listed in Table 2.

| Drug \ Method | DNP-AAP | AdaBoost | LASSO |
|---------------|---------|----------|-------|
| CIP           | 2       | 1        | 1     |
| TET           | 1       | 1        | 1     |
| PEN           | 2       | 1        | 1     |
| CFX           | 1       | 1        | 2     |
| AZM           | 1       | 0        | 0     |

**Table 5** AUC for logistic regression classifiers built using the top SNPs identified by DNP-AAP, LASSO, and AdaBoost.

| Drug \ Method | DNP-AAP | AdaBoost | LASSO |
|---------------|---------|----------|-------|
| CIP           | 0.994   | 0.992    | 0.988 |
| TET           | 0.969   | 0.921    | 0.852 |
| PEN           | 0.974   | 0.995    | 0.962 |
| CFX           | 0.976   | 0.959    | 0.952 |
| AZM           | 0.949   | 0.974    | 0.961 |

**Author details**

<sup>1</sup>Department of Computer Science, University of Saskatchewan, 110 Science Place, S7N 5C9 Saskatoon, Canada. <sup>2</sup> Department of Animal & Poultry Science, University of Saskatchewan, 51 Campus Drive, S7N 5A8 Saskatoon, Canada. <sup>3</sup> Department of Mathematics and Statistics, University of Saskatchewan, 106 Wiggins Road, S7N 5E6 Saskatoon, Canada. <sup>4</sup> Department of Biochemistry, Microbiology and Immunology, University of Saskatchewan, 107 Wiggins Road, S7N 5E5 Saskatoon, Canada. <sup>5</sup> Vaccine and Infectious Disease Organization – International Vaccine Center, 120 Veterinary Rd, S7N 5E3 Saskatoon, Canada.

**References**

- Perkins, S., Lacker, K., Theiler, J.: Grafting: Fast, incremental feature selection by gradient descent in function space. *Journal of Machine Learning Research* **3**, 1333–1356 (2003)
- Liu, B., Wei, Y., Zhang, Y., Yang, Q.: Deep neural networks for high dimension, low sample size data. In: Sierra, C. (ed.) *Proceedings of the 26th International Joint Conference on Artificial Intelligence: 19-25 August 2017*; Melbourne, pp. 2287–2293 (2017)
- Public Health Agency of Canada: National Surveillance of Antimicrobial Susceptibilities of *Neisseria Gonorrhoeae* Annual Summary 2014. <http://healthycanadians.gc.ca/publications/drugs-products-medicaments-produits/2014-neisseria/alt/surveillance-gonorrhoeae-2014-eng.pdf>
- Centers for Disease Control and Prevention. <https://www.cdc.gov/nchs/data/hus/hus07.pdf>
- World Health Organization: Global Action Plan to Control the Spread and Impact of Antimicrobial Resistance in *Neisseria Gonorrhoeae*. [http://apps.who.int/iris/bitstream/10665/44863/1/9789241503501\\_eng.pdf](http://apps.who.int/iris/bitstream/10665/44863/1/9789241503501_eng.pdf)
- Harrison, O.B., Clemence, M., Dillard, J.P., Tang, C.M., Trees, D., Grad, Y.H., Maiden, M.C.J.: Genomic analyses of *Neisseria gonorrhoeae* reveal an association of the gonococcal genetic island with antimicrobial resistance. *Journal of Infection* **73**(6), 578–587 (2016)
- Eyre, D.W., De Silva, D., Cole, K., Peters, J., Cole, M.J., Grad, Y.H., Demczuk, W., Martin, I., Mulvey, M.R., Crook, D.W., Walker, A.S., Peto, T.E.A., Paul, J.: WGS to predict antibiotic MICs for *Neisseria gonorrhoeae*. *J Antimicrob Chemother* **72**, 1937–1947 (2017)
- Unemo, M., Shafer, W.M.: Genomic analyses of antimicrobial resistance in *Neisseria gonorrhoeae* in the 21st century: past, evolution, and future. *Clinical Microbiology Reviews* **27**(3), 587–613 (2014)
